# Supplementary material for: Abrupt spin crossover in iron(iii) complexes with aromatic anions
Source: Royal Society of Chemistry journal article supplement (doi:10.1039/c9dt02373a), 2019-01-01
Supplement: c9dt02373a1.pdf [file c9dt02373a1.pdf]

## Supplementary Information for:

### Abrupt spin crossover in iron(III) complexes with aromatic anions

Sharon E. Lazaro,<sup>a</sup> Adil Alkaş,<sup>b</sup> Seok J. Lee,<sup>b</sup> Shane G. Telfer,<sup>b</sup> Keith S. Murray,<sup>c</sup>  
Wasinee Phonsri,<sup>c</sup> Phimpaka Harding<sup>a\*</sup> and David J. Harding<sup>a\*</sup>

<sup>a</sup> Functional Materials and Nanotechnology Center of Excellence, Walailak University, Thasala, Nakhon Si Thammarat, 80160, Thailand

<sup>b</sup> MacDiarmid Institute for Advanced Materials and Nanotechnology, Institute of Fundamental Sciences, Massey University, Palmerston North, New Zealand

<sup>c</sup> School of Chemistry, Monash University, Clayton, Victoria, 3800, Australia

**E-mail:** kphimpha@mail.wu.ac.th or h david@mail.wu.ac.th

**Website:** <https://www.funtechwu.com>

## Contents

|                                     |   |
|-------------------------------------|---|
| IR spectroscopy.....                | 2 |
| Solution magnetic studies.....      | 4 |
| X-ray crystallographic studies..... | 6 |
| DSC and TGA studies.....            | 8 |

## IR spectroscopy

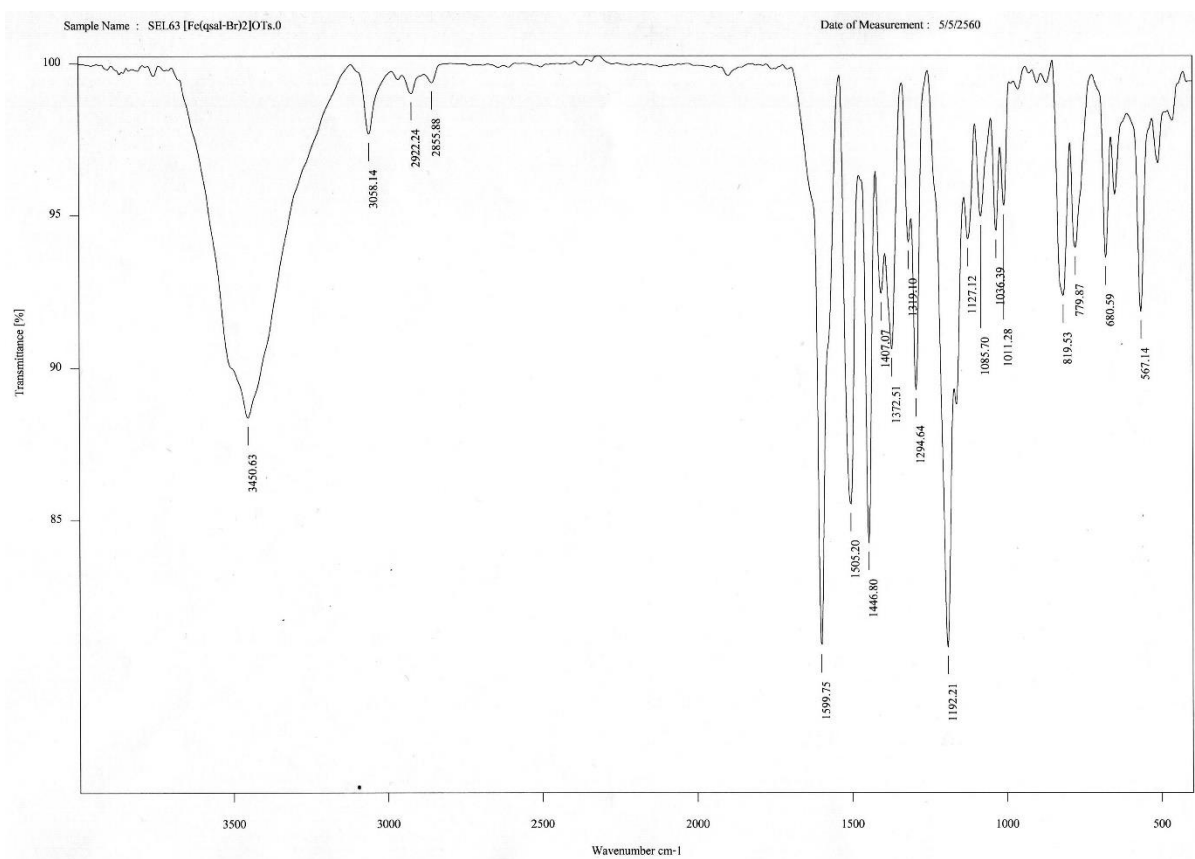

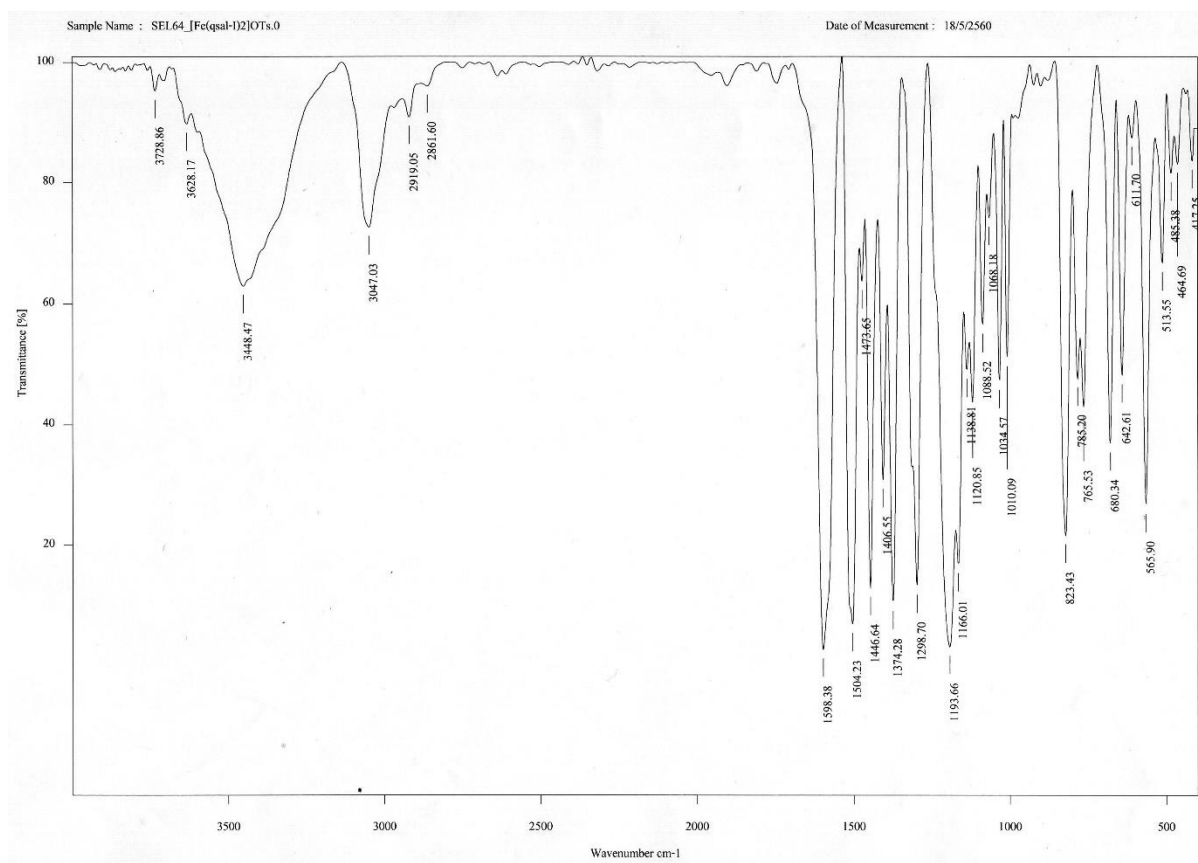

**Figure S1** IR spectra of  $[\text{Fe}(\text{qsal-X})_2]\text{OTs}\cdot n\text{H}_2\text{O}$ .

## Solution magnetic studies

The  $^1\text{H}$  NMR studies to determine the magnetic susceptibility of  $[\text{Fe}(\text{qsal-X})_2]\text{OTs}$  were recorded at 298 K in  $d^6$ -DMSO with TMS added as an internal standard against a reference of DMSO on a 300 MHz Bruker FT-NMR spectrometer following a modified Evan's method. The reference solvent was placed in a co-axial insert with the solution of the complex in a standard NMR tube. The mass susceptibility was calculated using:

$$\chi_g = \chi_0 + \frac{3\Delta\nu}{4\pi\nu_0 c}$$

where  $\chi_0$  = the mass susceptibility of DMSO ( $-0.629 \times 10^{-6} \text{ cm}^3\cdot\text{g}^{-1}$ ),  $\Delta\nu$  (Hz) is the paramagnetic shift of the reference,  $\nu_0$  is the operating RF frequency of the NMR spectrometer ( $300.13 \times 10^6$  Hz) and  $c$  is the concentration of the solution in  $\text{g}\cdot\text{cm}^{-3}$ . The mass susceptibility was then converted to molar susceptibility ( $\chi_M$ ). Diamagnetic corrections were applied and by multiplication with the measurement temperature (298 K)  $\chi_{MT}$  was determined.

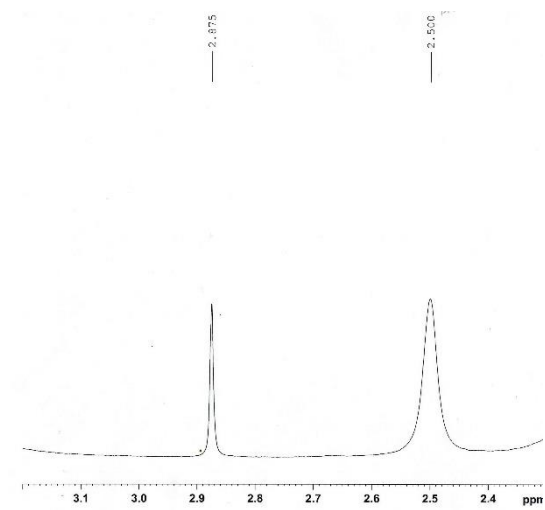

**X = Br**

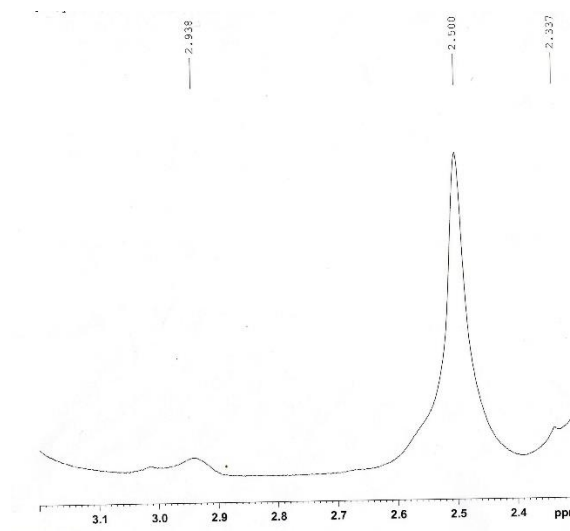

**X = I**

**Figure S2**  $^1\text{H}$  NMR spectrum of  $[\text{Fe}(\text{qsal-X})_2]\text{OTs}$  in  $\text{d}^6\text{-DMSO}$  showing the TMS shift.

**Table S1** Selected  $^1\text{H}$  NMR data of **1-2** in  $\text{d}^6\text{-DMSO}$  at 298 K.

| Compound                                  | Concentration ( $\text{g}/\text{cm}^3$ ) | $\Delta\nu$ (Hz) | $\chi_{\text{MT}}$ ( $\text{cm}^3\cdot\text{mol}^{-1}\cdot\text{K}$ ) | %HS |
|-------------------------------------------|------------------------------------------|------------------|-----------------------------------------------------------------------|-----|
| $[\text{Fe}(\text{qsal-Br})_2]\text{OTs}$ | 0.01                                     | 150.05           | 2.59                                                                  | 55  |
| $[\text{Fe}(\text{qsal-I})_2]\text{OTs}$  | 0.01                                     | 175.25           | 3.03                                                                  | 66  |

## X-ray crystallographic studies

**Table S2** Crystallographic data and structure refinement parameters for [Fe(qsal-X)<sub>2</sub>]OTs·nH<sub>2</sub>O complexes.

|                                                                                                      | <b>1·H<sub>2</sub>O</b><br>103 K                                                                   | <b>1·H<sub>2</sub>O</b><br>293 K                                                                   | <b>2·2H<sub>2</sub>O</b><br>103 K                                                                  |
|------------------------------------------------------------------------------------------------------|----------------------------------------------------------------------------------------------------|----------------------------------------------------------------------------------------------------|----------------------------------------------------------------------------------------------------|
| Formula                                                                                              | C <sub>39</sub> H <sub>27</sub> Br <sub>2</sub> FeN <sub>4</sub> O <sub>5</sub> S·H <sub>2</sub> O | C <sub>39</sub> H <sub>27</sub> Br <sub>2</sub> FeN <sub>4</sub> O <sub>5</sub> S·H <sub>2</sub> O | C <sub>39</sub> H <sub>27</sub> I <sub>2</sub> FeN <sub>4</sub> O <sub>5</sub> S·2H <sub>2</sub> O |
| Formula weight                                                                                       | 897.39                                                                                             | 897.39                                                                                             | 1008.85                                                                                            |
| Crystal system                                                                                       | Orthorhombic                                                                                       | Orthorhombic                                                                                       | Orthorhombic                                                                                       |
| Space group                                                                                          | <i>Pca2<sub>1</sub></i>                                                                            | <i>Pca2<sub>1</sub></i>                                                                            | <i>Pca2<sub>1</sub></i>                                                                            |
| <i>a</i> /Å                                                                                          | 12.3433(8)                                                                                         | 12.4432(3)                                                                                         | 12.7045(3)                                                                                         |
| <i>b</i> /Å                                                                                          | 14.3546(8)                                                                                         | 14.6561(4)                                                                                         | 14.1173(3)                                                                                         |
| <i>c</i> /Å                                                                                          | 19.2425(14)                                                                                        | 19.1005(13)                                                                                        | 20.3416(14)                                                                                        |
| $\alpha$ /°                                                                                          | 90                                                                                                 | 90                                                                                                 | 90                                                                                                 |
| $\beta$ /°                                                                                           | 90                                                                                                 | 90                                                                                                 | 90                                                                                                 |
| $\gamma$ /°                                                                                          | 90                                                                                                 | 90                                                                                                 | 90                                                                                                 |
| <i>T</i> /K                                                                                          | 103                                                                                                | 293                                                                                                | 103                                                                                                |
| Cell volume/Å <sup>3</sup>                                                                           | 3409.4(4)                                                                                          | 3483.3(3)                                                                                          | 3648.3(3)                                                                                          |
| <i>Z</i>                                                                                             | 4                                                                                                  | 4                                                                                                  | 4                                                                                                  |
| Absorption coefficient (mm <sup>-1</sup> )                                                           | 7.346                                                                                              | 7.190                                                                                              | 17.621                                                                                             |
| Reflections collected                                                                                | 18081                                                                                              | 19306                                                                                              | 17087                                                                                              |
| Independent reflections                                                                              | 2928                                                                                               | 8805                                                                                               | 5211                                                                                               |
| <i>R</i> <sub>int</sub>                                                                              | 0.1447                                                                                             | 0.1167                                                                                             | 0.0791                                                                                             |
| Max. and min. transition                                                                             | 1.000/0.091                                                                                        | 1.000/0.192                                                                                        | 1.000/0.350                                                                                        |
| Restraints/parameters                                                                                | 235/464                                                                                            | 21/383                                                                                             | 85/486                                                                                             |
| Final <i>R</i> indices [ <i>I</i> >2σ( <i>I</i> ):<br><i>R</i> <sub>1</sub> , <i>wR</i> <sub>2</sub> | 0.0859/0.1901                                                                                      | 0.0773/0.2198                                                                                      | 0.0622/0.1516                                                                                      |
| CCDC                                                                                                 | 1920841                                                                                            | 1920840                                                                                            | 1920842                                                                                            |

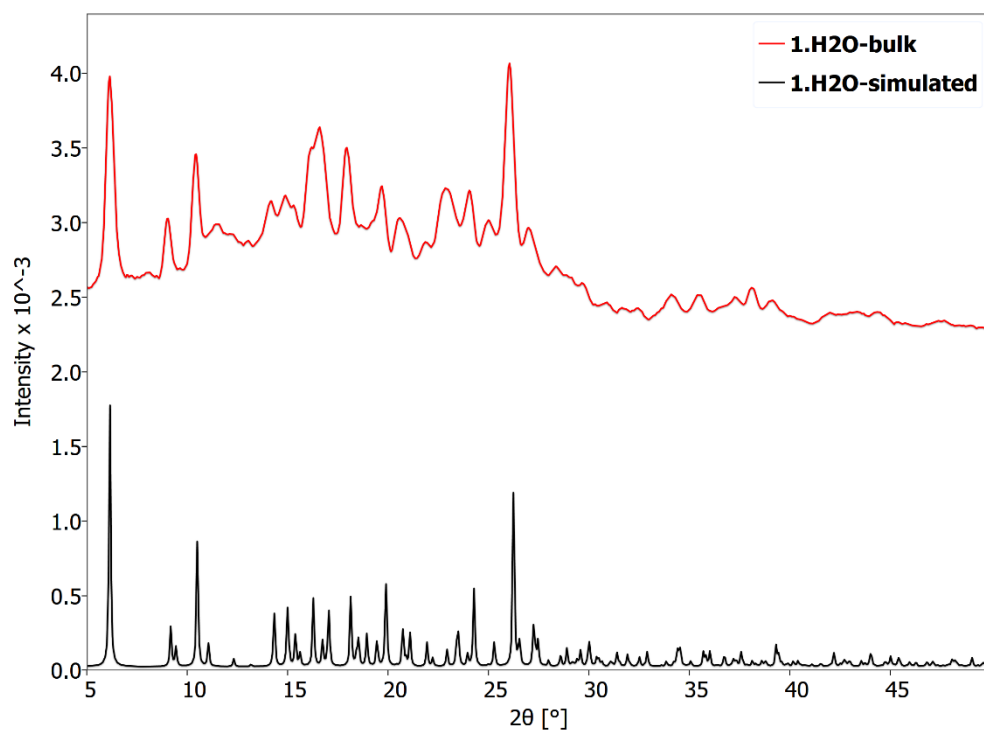

**Figure S3** PXRd of  $[\text{Fe}(\text{qsal-Br})_2]\text{OTs}\cdot\text{H}_2\text{O}$ .

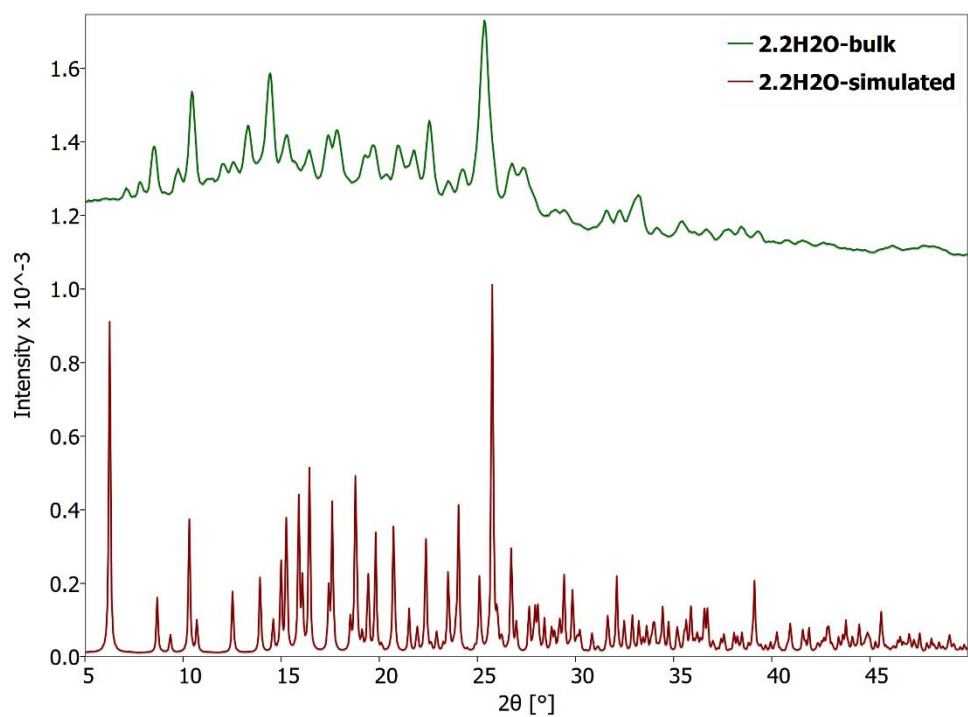

**Figure S4** PXRd of  $[\text{Fe}(\text{qsal-I})_2]\text{OTs}\cdot 2\text{H}_2\text{O}$ .

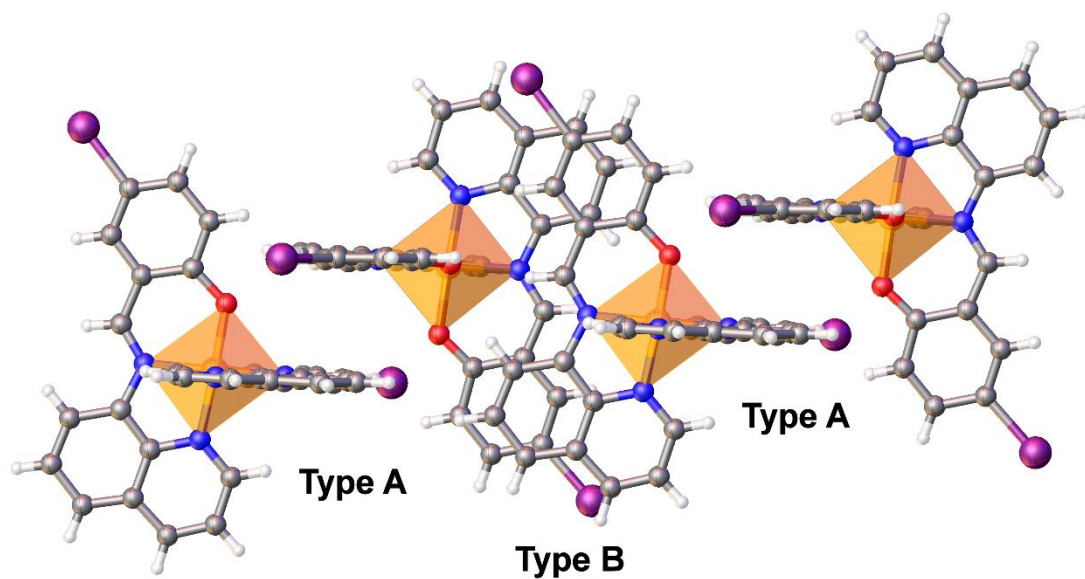

Figure S5 View of the Type A and Type B  $\pi$ - $\pi$  interactions in  $[\text{Fe}(\text{qsal-I})_2]\text{OTs}\cdot 2\text{H}_2\text{O}\cdot 2\text{H}_2\text{O}$ .

### DSC and TGA studies

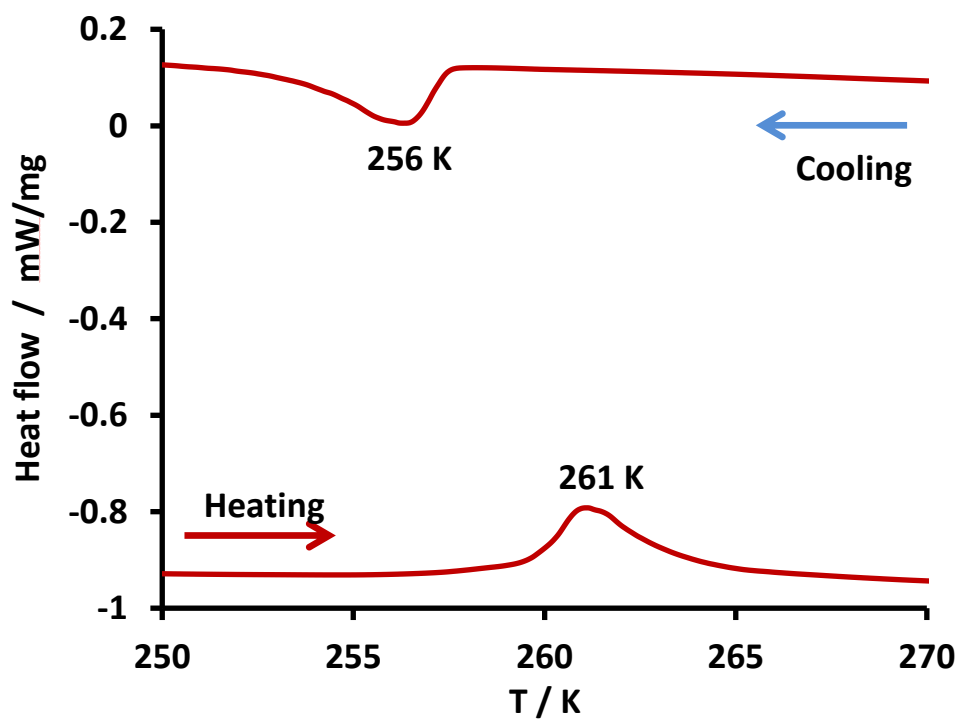

Figure S6 DSC plot for  $[\text{Fe}(\text{qsal-Br})_2]\text{OTs}$ .

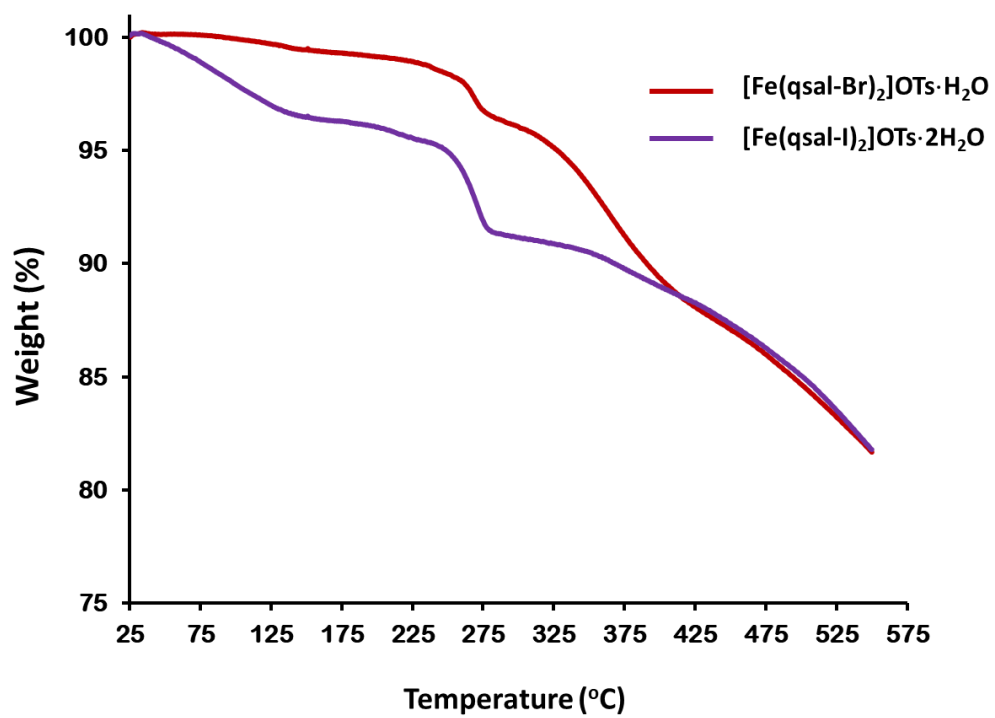

Figure S7 TGA studies of [Fe(qsal-X)<sub>2</sub>]OTs.
